# Supplementary material for: Retracted Article: Light-triggered nitric oxide release and targeted fluorescence imaging in tumor cells developed from folic acid-graft-carboxymethyl chitosan nanospheres
Source: Royal Society of Chemistry journal article supplement (doi:10.1039/c4ra03034f), 2014-01-01
Supplement: c4ra03034f1.pdf [file c4ra03034f1.pdf]

## Supporting Information

1 Light-triggered nitric oxide release and targeted fluorescence imaging in tumor

2 cells developed from folic acid-graft-carboxymethyl chitosan nanospheres

3 Rijun Gui,<sup>a,b</sup> Ajun Wan,<sup>a,b,\*</sup> Yalei Zhang,<sup>a</sup> Huili Li,<sup>c,\*</sup> and Tingting Zhao<sup>b</sup>

4 <sup>a</sup> State Key Laboratory of Pollution Control and Resources Reuse, National Engineering Research Center of  
5 Facilities Agriculture, Tongji University, Shanghai 200092, P.R. China. E-mail: [wanajun@tongji.edu.cn](mailto:wanajun@tongji.edu.cn) (A. Wan);  
6 Fax: +86 21 54745706. Tel.: +86 21 34201245.

7 <sup>b</sup> Department of Chemistry, School of Chemistry and Chemical Engineering, Shanghai Jiao Tong University,  
8 Shanghai 200240, P.R. China.

9 <sup>c</sup> School of Pharmacy, Shanghai Jiao Tong University, Shanghai 200240, P.R. China. E-mail: [lihl@sjtu.edu.cn](mailto:lihl@sjtu.edu.cn) (H.  
10 Li).

11

### 12 Part S1 Synthesis of PEI-stabilized CQD

13 Briefly, 200 mg of glucose was added into 10 mL solution of glycol/water (1/1, v/v) to form clear mixed solution  
14 under stirring and ultrasound. The mixed solution was added to a high pressure nitrifying pot, and heated at 180 °C  
15 in a constant-temperature drying oven for 3 h to generate bare CQD. Then, 1.0 mL of PEI solution (20%, v/v) was  
16 mixed with 10 mL of the bared CQD solution and rapidly stirred for 3 h at 80 °C. Under ultraviolet lamp excitation,  
17 strong fluorescence emission of the final reaction solution indicated the formation of PEI modified or stabilized  
18 CQD (*i.e.* PEI-CQD, 1 wt.%).

19

### 20 Part S2 Determination of NO concentrations

21 To determine the NO release from CMC-FA-RBS hybrid nanospheres in aqueous solution (PBS, 10 mM, pH  
22 7.4), the colorimetric Griess reaction was employed to measure nitrite or nitrate content in the PBS of CMC-FA-  
23 RBS. The details are available as follows: aliquots of PBS of CMC-FA-RBS (1.0 mg·mL<sup>-1</sup>, 5 mL) was taken and  
24 stirred in a centrifugal tube at 37 °C in a water bath. At appropriate time intervals, the solution was centrifuged for  
25 10 min, and the supernatant (0.5 mL) was extracted, replenished with the PBS and combined with Griess reagent (I)  
26 (0.1 wt.% of β-naphthylethylenediamine dihydrochloride aqueous solution, 1 mL) and (II) (1 wt.% of sulfanilamide  
27 in 5 wt.% of phosphoric acid aqueous solution, 1 mL). The resultant mixed solution was incubated for 15 min at  
28 room temperature, protected from light (*i.e.*, in the dark). A purple/magenta color appeared immediately. The  
29 maximum absorbance was recorded (at 540 nm) by using UV-vis spectrophotometer, and the standard curve was  
30 determined by measuring sodium nitrite (0-100 μM) in PBS. The total release of NO was calculated according to  
31 the following equations:

$$32 \quad R_1 = C_1 \times 0.005;$$

$$33 \quad R_2 = C_2 \times 0.005 + C_1 \times 0.001;$$

$$34 \quad R_3 = C_3 \times 0.005 + (C_2 + C_1) \times 0.001;$$

35 .....

$$36 \quad R_n = C_n \times 0.005 + (C_{n-1} + C_{n-2} + \dots + C_1) \times 0.001$$

37 where  $R_n$  is the release amount of NO measured at each time point, and  $C_n$  is the concentration of NO.

38

### 39 Part S3 PL stability of CMC-FA-CQD hybrid nanospheres

# Supporting Information

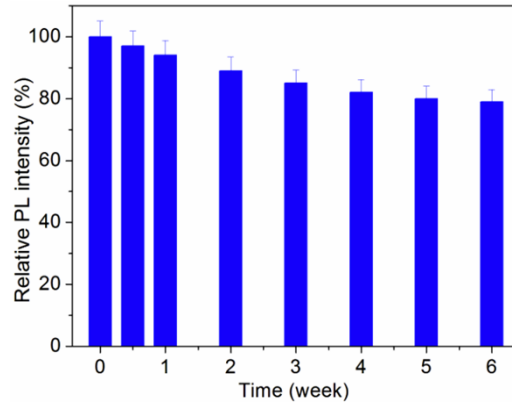

1  
2 **Fig. S1** Relative PL intensity of  $1.0 \text{ mg} \cdot \text{mL}^{-1}$  of CMC-FA-CQD hybrid nanospheres stored in  $10 \text{ mM}$  of PBS (pH  
3 7.4) for different times at room temperature ( $\sim 20 \text{ }^\circ\text{C}$ ).  
4

## 5 **Part S4** light-triggered NO release from CMC-FA-RBS nanospheres

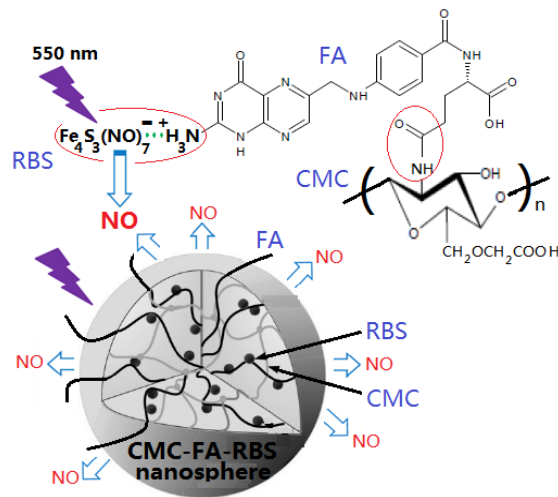

6  
7 **Fig. S2** Schematic illustration of the chemistry structure, spherical model and light-triggered NO release of the  
8 designed CMC-FA-RBS hybrid nanosphere system.  
9

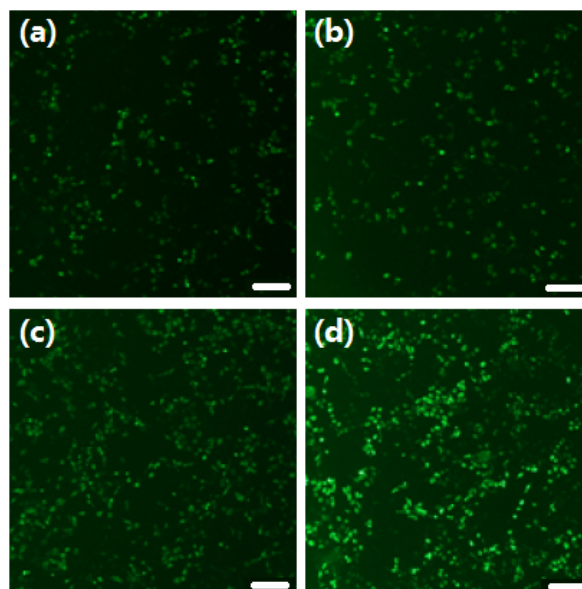

## Supporting Information

1 **Fig. S3** Fluorescence imaging of (a) L02, (b) A549, (c) HepG2, and (d) HeLa cells after 24 h incubation with the  
2 CMC-FA-CQD hybrid nanospheres ( $1 \text{ mg} \cdot \text{mL}^{-1}$ ), excited at 440 nm. The scale bar is 100  $\mu\text{m}$ .

3

4 **Part S5** Florescence imaging from CMC-FA-CQD nanospheres

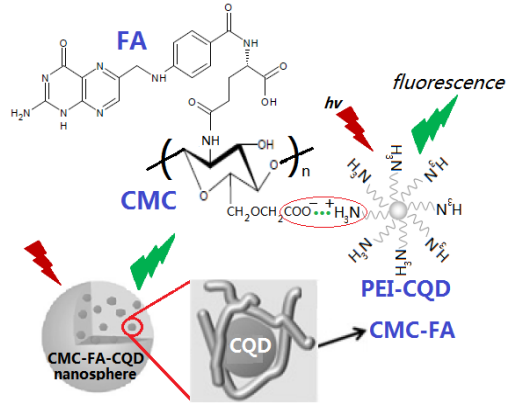

5

6 **Fig. S4** Schematic illustration of the chemistry structure, spherical model and fluorescence emission of the  
7 designed CMC-FA-CQD hybrid nanosphere system.

8
